# Supplementary material for: Exploring the potential of lanthanide-doped oxyfluoride materials for bright green upconversion and their promising applications towards temperature sensing and drug delivery
Source: Royal Society of Chemistry journal article supplement (doi:10.1039/d4tc01740d), 2024-01-01
Supplement: d4tc01740d1.pdf [file d4tc01740d1.pdf]

## Supporting Information

### Exploring the Potential of Lanthanide-Doped Oxyfluoride Materials for Bright Green Upconversion and Their Promising Applications Towards Temperature Sensing and Drug Delivery

Sonali Mohanty<sup>a,b</sup>, Mirijam Lederer<sup>a</sup>, Simona Premcheska<sup>a,c</sup>, Hannes Rijckaert<sup>d</sup>, Klaartje De Buysser<sup>d</sup>, Els Bruneel<sup>e</sup>, Andre Skirtach<sup>c</sup>, Kristof Van Hecke<sup>b</sup>, Anna M. Kaczmarek<sup>a\*</sup>

#### Cytotoxicity study

##### Cell Cultures

Healthy Normal Human Dermal Fibroblasts (NHDFs) were cultured in the appropriate cell growth medium (containing Dulbecco's Modified Eagle Medium (DMEM), 10% Fetal Bovine Serum (FBS), 1% Penicillin-Streptomycin) and were seeded in 96-well plates at a concentration of 5,000 cells/well upon reaching optimal confluency state (80-90%) during early culture passage stages (P3-P6). Upon cell seeding the cell plates were incubated in the dark at 37 °C and 5% CO<sub>2</sub> for 24 hours before sample addition.

##### PrestoBlue™ HS cell viability assay

A 2D cell-based assay was performed to preliminarily evaluate the compatibility of the SiO<sub>2</sub>@YOF:Yb<sup>3+</sup>,Er<sup>3+</sup> with in vitro cultured healthy Normal Human Dermal Fibroblasts (NHDFs) by conducting dark cytotoxicity tests. The toxicity evaluation was done utilizing PrestoBlue™ HS reagent in a fluorometric, end-point assay. This resazurin-based cell-permeable reagent, once incubated with metabolically active cells is reduced intracellularly to its highly fluorescent form, resorufin, allowing a very sensitive and directly proportional quantitative assessment of the number of viable cells upon contact incubation with the investigated material. The fluorescence spectroscopy readout was done at  $\lambda_{em} = 635$  nm, upon excitation at 560 nm.

The toxicity tests were conducted in a concentration-dependent manner in a series of sample concentrations ranging from 0-5 mg/mL where each sample concentration was tested on five technical replicates. The material as dry powder was dispersed in the cell growth medium solution (DMEM: 10% FBS, 1% Pen-Strep) to obtain solution homogeneity and split particle agglomerates by vortexing for 1 minute followed by sonication for 10 minutes. Upon appropriate sample addition, the plates were incubated for 24 hours in the dark at 37 °C and 5% CO<sub>2</sub>. After 24 hours long incubation of the cells with the investigated material in varying concentrations, 20  $\mu$ L of the PrestoBlue™ HS reagent was added to all the wells, and the plates were placed back in dark incubation for 4 hours at 37 °C and 5% CO<sub>2</sub>. Both negative and positive controls were included simultaneously: the (sample) negative controls contained seeded cells, cell growth medium, and PrestoBlue™ HS cell viability reagent, while positive controls (or PB-blanks) contained PrestoBlue™ HS cell viability reagent and cell growth medium. The fluorescence emission of the multiwell plates was measured on a Tecan spectrophotometer, equipped with a microplate reader and appropriate optical filters.

The raw data was normalized with respect to the (sample) negative controls, by correcting it to 100% cell viability with the positive controls (and averaging it in the end), in the following way:

$$\text{Cell viability [\%]} = \frac{[FI(\text{technical replicate}) - FI(\text{positive controls average})]}{[FI(\text{negative control}) - FI(\text{positive controls average})]} \times 100 \text{ (eqn 1)}$$

Where FI stands for fluorescence emission intensity measured at 635 nm; a technical replicate is a technically repeated sample concentration well containing seeded cells, cell growth medium, sample, and PrestoBlue™ HS cell viability reagent; (sample) negative controls represent plate wells containing seeded cells, cell growth medium solution, and PrestoBlue™ HS cell viability reagent; and positive controls (or PB-blanks) represent plate wells containing cell growth medium and PrestoBlue™ HS cell viability reagent; all equalized to the same final volume per well per plate by cell growth medium solution.

##### Widefield microscopy imaging

Multiwell plates containing parallel technical replicates were also prepared under identical treatment for widefield microscopy imaging for the same series of sample concentrations, replacing the PrestoBlue™ HS cell viability reagent with Calcein-AM, a

fluorescent cell labeling dye with a concentration of 0.3  $\mu\text{L}/\text{well}$  or a final well concentration of 1.5  $\mu\text{M}$ . Upon dye addition, the plates were incubated for 20 minutes in the dark at 37°C and 5%  $\text{CO}_2$  to allow dye permeation. The cell visualization was performed on a Nikon-Ti fluorescence microscope equipped with an Andor camera, using a Green Fluorescent Protein (GFP) long-pass filter transmitting all emitted wavelengths  $\geq 500$  nm, under dye excitation of 470 nm.

## Drug loading and drug release study

To study drug loading and release behavior in the hollow  $\text{YOF}:\text{Yb}^{3+},\text{Er}^{3+}$  particles, the commonly used water-soluble anti-cancer drug doxorubicin hydrochloride (DOX-HCl) was chosen as the model drug (throughout the manuscript, for simplicity, it will be referred to as DOX). In brief, for each experiment 5 mg of hollow  $\text{YOF}:\text{Yb}^{3+},\text{Er}^{3+}$  particles was dispersed in 1 mL phosphate-buffered saline (PBS, pH 7.4) containing 5 mg of DOX. This suspension was left for 24 h at RT with continuous stirring in the dark. Afterwards the particles were centrifuged at 11000 RPM for 10 minutes. The particles were washed and centrifuged repeatedly until a clear supernatant was collected. The supernatant solution was collected for UV-Vis analysis to access the concentration of the DOX which did not load into the particles, using a previously prepared calibration curve (Figure S12). The obtained YOF-DOX was dried overnight in an oven at 80°C. The UV-Vis absorbance was monitored at 480 nm. The amount of DOX loaded into the  $\text{YOF}:\text{Yb}^{3+},\text{Er}^{3+}$  was assessed based on the initial mass of DOX and the final mass of DOX detected through UV-Vis absorbance analysis in the supernatant. The drug Loading Capacity (LC%) was calculated using the following formula (eqn 2):

$$LC\% = \frac{\text{mass of DOX in YOF}}{\text{mass of DOX loaded YOF}} \times 100 \text{ (eqn 2)}$$

The drug Encapsulation Efficiency (EE%) was calculated using the following formula (eqn 3):

$$EE\% = \frac{\text{mass of DOX in YOF}}{\text{mass of initial DOX}} \times 100 \text{ (eqn 3)}$$

The DOX drug release experiments were carried out in PBS buffer at three different pH values: 7.4, 5.5 and 4. In a typical procedure 5 mg of DOX loaded  $\text{YOF}:\text{Yb}^{3+},\text{Er}^{3+}$  (DOX-YOF) was dispersed in 0.5 mL PBS buffer. This suspension was poured into a dialysis bag with a cutoff of 6000-8000 Da and tightly secured with clams on both sides. The dialysis bag was placed horizontally in a vial filled with 20 mL PBS buffer. The vial was closed and placed on a shaker (Orbital mini shaker, VWR) set at 37°C. The dialysate containing the released DOX was sampled (3 mL) at appropriate time intervals. The samples were put back to the vial after UV-Vis measurements. The amount of DOX released from the particles was measured by monitoring the absorbance of DOX at 480 nm.

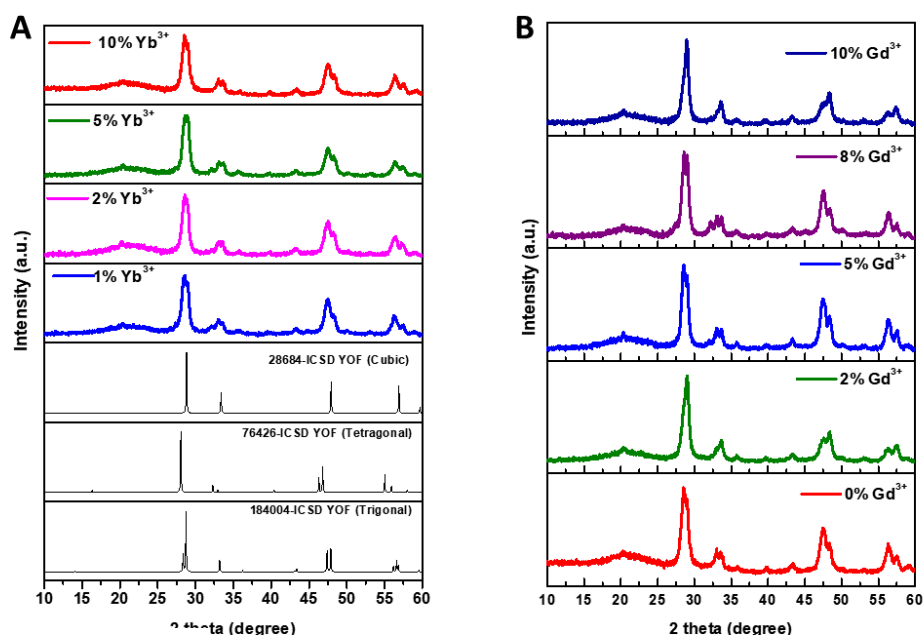

Figure S1. Powder XRD patterns of (A)  $\text{SiO}_2@YOF:x\%Yb^{3+}, 1\%Er^{3+}$  ( $x = 1\%, 2\%, 5\%, 10\%$ ) (B)  $\text{SiO}_2@YOF:10\%Yb^{3+}, 1\%Er^{3+}, x\%Gd^{3+}$  ( $x = 2\%, 5\%, 8\%, 10\%$ ).

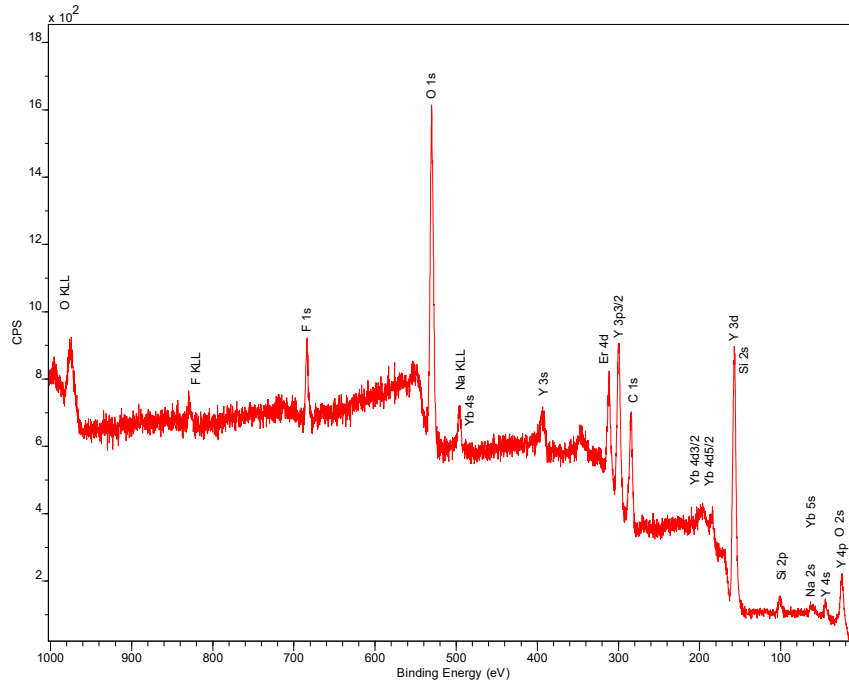

Figure S2. XPS (survey data as well as the simulated Mn2p peaks assuming a Mn/Y ratio of 1/9 in  $\text{SiO}_2@YOF:20\%Yb^{3+}, 1\%Er^{3+}, 10\%Mn^{2+}$ ).

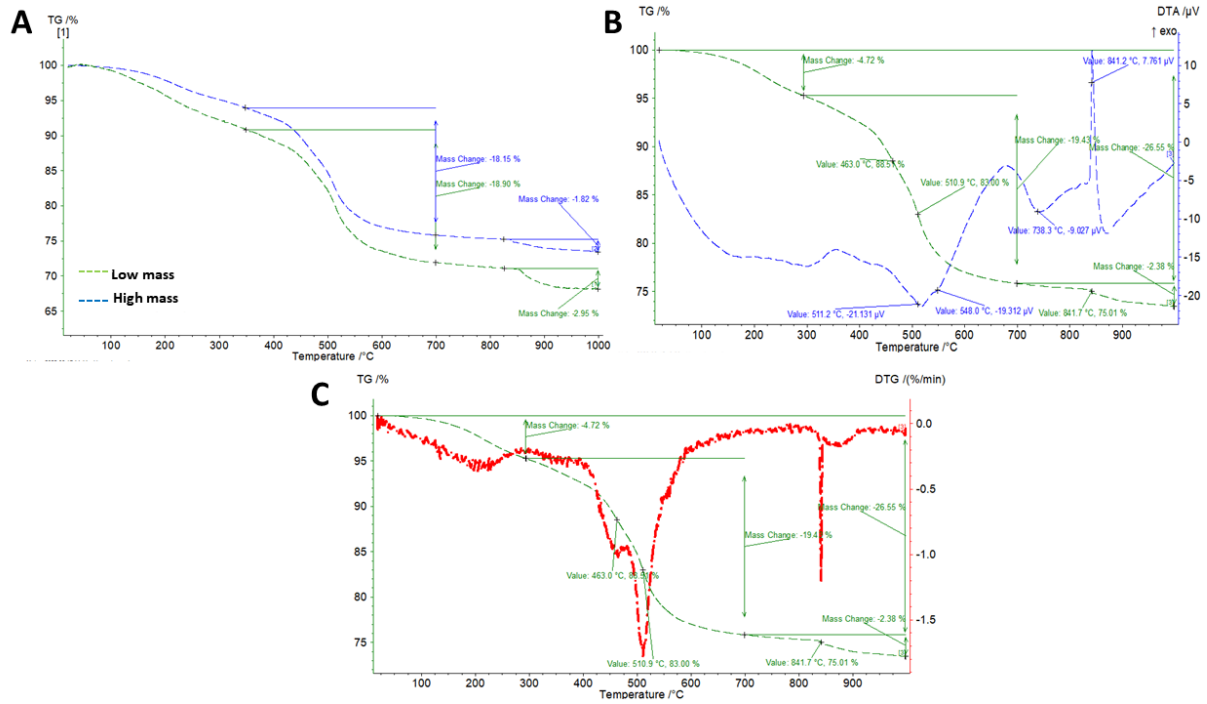

Figure S3. TGA and DTG analysis for  $\text{SiO}_2@NaYF_4:Yb^{3+}, Er^{3+}$ .

**Table S1:** Estimated composition based on XPS analysis for selected samples.

| SiO <sub>2</sub> @YOF:20%Yb <sup>3+</sup> ,1%Er <sup>3+</sup> ,<br>x% Mn <sup>2+</sup> | O    | Y    | F   | Yb  | Mn |
|----------------------------------------------------------------------------------------|------|------|-----|-----|----|
| 10% Mn <sup>2+</sup>                                                                   | 69.8 | 16.3 | 9.9 | 4.0 | 0  |
| 2% Mn <sup>2+</sup>                                                                    | 74.7 | 13.8 | 8   | 2.5 | 0  |

**Table S2:** Overview of ICP-OES analysis for all prepared samples.

| Compound Name and<br>Theoretical Value (mol %)                                        | mol%<br>Y <sup>3+</sup> | mol% Yb <sup>3+</sup> | mol% Er <sup>3+</sup> | mol% Gd <sup>3+</sup> | mol% Mn <sup>2+</sup> | mol% Li <sup>+</sup> |
|---------------------------------------------------------------------------------------|-------------------------|-----------------------|-----------------------|-----------------------|-----------------------|----------------------|
| 98%Y <sup>3+</sup> :1%Yb <sup>3+</sup> ,1% Er <sup>3+</sup>                           | 97.77                   | 1.20                  | 1.02                  |                       |                       |                      |
| 97%Y <sup>3+</sup> :2% Yb <sup>3+</sup> ,1% Er <sup>3+</sup>                          | 97.04                   | 2.00                  | 0.95                  |                       |                       |                      |
| 94%Y <sup>3+</sup> :5% Yb <sup>3+</sup> ,1% Er <sup>3+</sup>                          | 94.58                   | 4.38                  | 1.03                  |                       |                       |                      |
| 89%Y <sup>3+</sup> :10% Yb <sup>3+</sup> ,1% Er <sup>3+</sup>                         | 82.97                   | 16.09                 | 0.94                  |                       |                       |                      |
| 79%Y <sup>3+</sup> :20% Yb <sup>3+</sup> ,1% Er <sup>3+</sup>                         | 80.82                   | 17.11                 | 2.07                  |                       |                       |                      |
| 87%Y <sup>3+</sup> :10% Yb <sup>3+</sup> ,1% Er <sup>3+</sup> ,2%Gd <sup>3+</sup>     | 86.83                   | 10.08                 | 1.07                  | 2.02                  |                       |                      |
| 84%Y <sup>3+</sup> :10% Yb <sup>3+</sup> ,1%Er <sup>3+</sup> ,5% Gd <sup>3+</sup>     | 83.44                   | 10.49                 | 1.12                  | 4.95                  |                       |                      |
| 81%Y <sup>3+</sup> :10% Yb <sup>3+</sup> ,1%Er <sup>3+</sup> ,8% Gd <sup>3+</sup>     | 80.44                   | 10.36                 | 1.33                  | 7.87                  |                       |                      |
| 79%Y <sup>3+</sup> :10% Yb <sup>3+</sup> ,1%Er <sup>3+</sup> ,10%<br>Gd <sup>3+</sup> | 77.71                   | 11.19                 | 1.12                  | 9.98                  |                       |                      |
| 77%Y <sup>3+</sup> :20% Yb <sup>3+</sup> ,1%Er <sup>3+</sup> ,2% Gd <sup>3+</sup>     | 70.06                   | 26.60                 | 1.02                  | 2.31                  |                       |                      |
| 74%Y <sup>3+</sup> :20% Yb <sup>3+</sup> ,1%Er <sup>3+</sup> ,5% Gd <sup>3+</sup>     | 71.55                   | 22.00                 | 1.18                  | 5.26                  |                       |                      |
| 71%Y <sup>3+</sup> :20% Yb <sup>3+</sup> ,1%Er <sup>3+</sup> ,8% Gd <sup>3+</sup>     | 68.92                   | 22.28                 | 1.10                  | 7.69                  |                       |                      |
| 69%Y <sup>3+</sup> :20% Yb <sup>3+</sup> ,1%Er <sup>3+</sup> ,10%<br>Gd <sup>3+</sup> | 58.01                   | 30.65                 | 1.37                  | 9.96                  |                       |                      |
| 77%Y <sup>3+</sup> :20% Yb <sup>3+</sup> ,1%Er <sup>3+</sup> ,2%<br>Mn <sup>2+</sup>  | 77.49                   | 21.22                 | 1.27                  |                       | 0.011*                |                      |
| 74%Y <sup>3+</sup> :20% Yb <sup>3+</sup> ,1%Er <sup>3+</sup> ,5%<br>Mn <sup>2+</sup>  | 79.48                   | 19.45                 | 1.06                  |                       | 0.074*                |                      |
| 71%Y <sup>3+</sup> :20% Yb <sup>3+</sup> ,1%Er <sup>3+</sup> ,8%<br>Mn <sup>2+</sup>  | 67.82                   | 30.41                 | 1.77                  |                       | 0.006*                |                      |
| 69%Y <sup>3+</sup> :20% Yb <sup>3+</sup> ,1%Er <sup>3+</sup> ,10%<br>Mn <sup>2+</sup> | 71.18                   | 27.36                 | 1.42                  |                       | 0.035*                |                      |
| 77%Y <sup>3+</sup> :20% Yb <sup>3+</sup> ,1%Er <sup>3+</sup> ,2% Li <sup>+</sup>      | 79.59                   | 18.63                 | 1.78                  |                       |                       | *                    |
| 74%Y <sup>3+</sup> :20% Yb <sup>3+</sup> ,1%Er <sup>3+</sup> ,5% Li <sup>+</sup>      | 79.84                   | 18.38                 | 1.78                  |                       |                       | *                    |
| 71%Y <sup>3+</sup> :20% Yb <sup>3+</sup> ,1%Er <sup>3+</sup> ,8% Li <sup>+</sup>      | 78.48                   | 20.03                 | 1.48                  |                       |                       | *                    |
| 69%Y <sup>3+</sup> :20% Yb <sup>3+</sup> ,1%Er <sup>3+</sup> ,10% Li <sup>+</sup>     | 75.01                   | 23.69                 | 1.29                  |                       |                       | *                    |

\* The identification of these particular metal ions cannot be achieved through the utilization of ICP-OES.

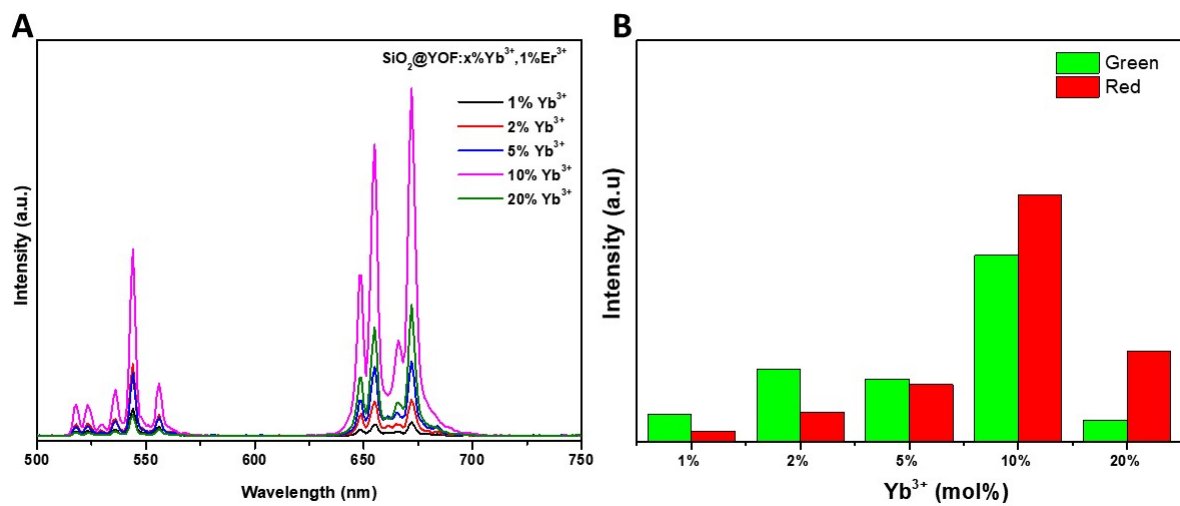

Figure S4. (A) Emission spectra and (B) Green/Red (G/R) ratios for YOF:x%Yb<sup>3+</sup>,1%Er<sup>3+</sup> where (x = 1%, 2%, 5%, 10%, 20%).

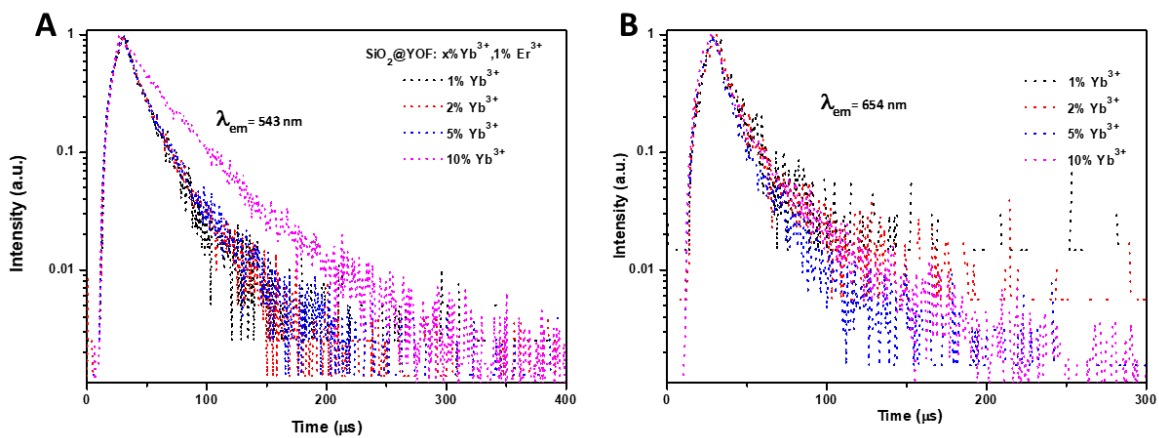

Figure S5. Luminescence decay profiles for (A) green  $^4S_{3/2} \rightarrow ^4I_{15/2}$  (543 nm) and (B) red  $^4F_{9/2} \rightarrow ^4I_{15/2}$  (654 nm) emission peaks in SiO<sub>2</sub>@YOF:x%Yb<sup>3+</sup>,Er<sup>3+</sup> (x = 1%, 2%, 5%, 10%).

**Table S3:** Overview of decay curves and  $R^2$  of the green  ${}^4S_{3/2} \rightarrow {}^4I_{15/2}$  (543 nm) and red  ${}^4F_{9/2} \rightarrow {}^4I_{15/2}$  (654 nm) emission peaks.

| SiO <sub>2</sub> @YOF:x%Yb <sup>3+</sup> ,1% Er <sup>3+</sup> | $\tau_{543}$ [ $\mu$ s] | $R^2$ |
|---------------------------------------------------------------|-------------------------|-------|
| 1% Yb <sup>3+</sup>                                           | 118                     | 0.972 |
| 2% Yb <sup>3+</sup>                                           | 147                     | 0.991 |
| 5% Yb <sup>3+</sup>                                           | 133                     | 0.988 |
| 10% Yb <sup>3+</sup>                                          | 264                     | 0.995 |
| 20% Yb <sup>3+</sup>                                          | 67                      | 0.990 |

  

| SiO <sub>2</sub> @YOF:x%Yb <sup>3+</sup> ,1% Er <sup>3+</sup> | $\tau_{654}$ [ $\mu$ s] | $R^2$  |
|---------------------------------------------------------------|-------------------------|--------|
| 1% Yb <sup>3+</sup>                                           | 81                      | 0.711* |
| 2% Yb <sup>3+</sup>                                           | 85                      | 0.924* |
| 5% Yb <sup>3+</sup>                                           | 72                      | 0.979  |
| 10% Yb <sup>3+</sup>                                          | 103                     | 0.993  |
| 20% Yb <sup>3+</sup>                                          | 122                     | 0.997  |

\*The  $R^2$  coefficient of determination for these samples was low, indicating a weak signal, which made it challenging to obtain good-quality decay profiles.

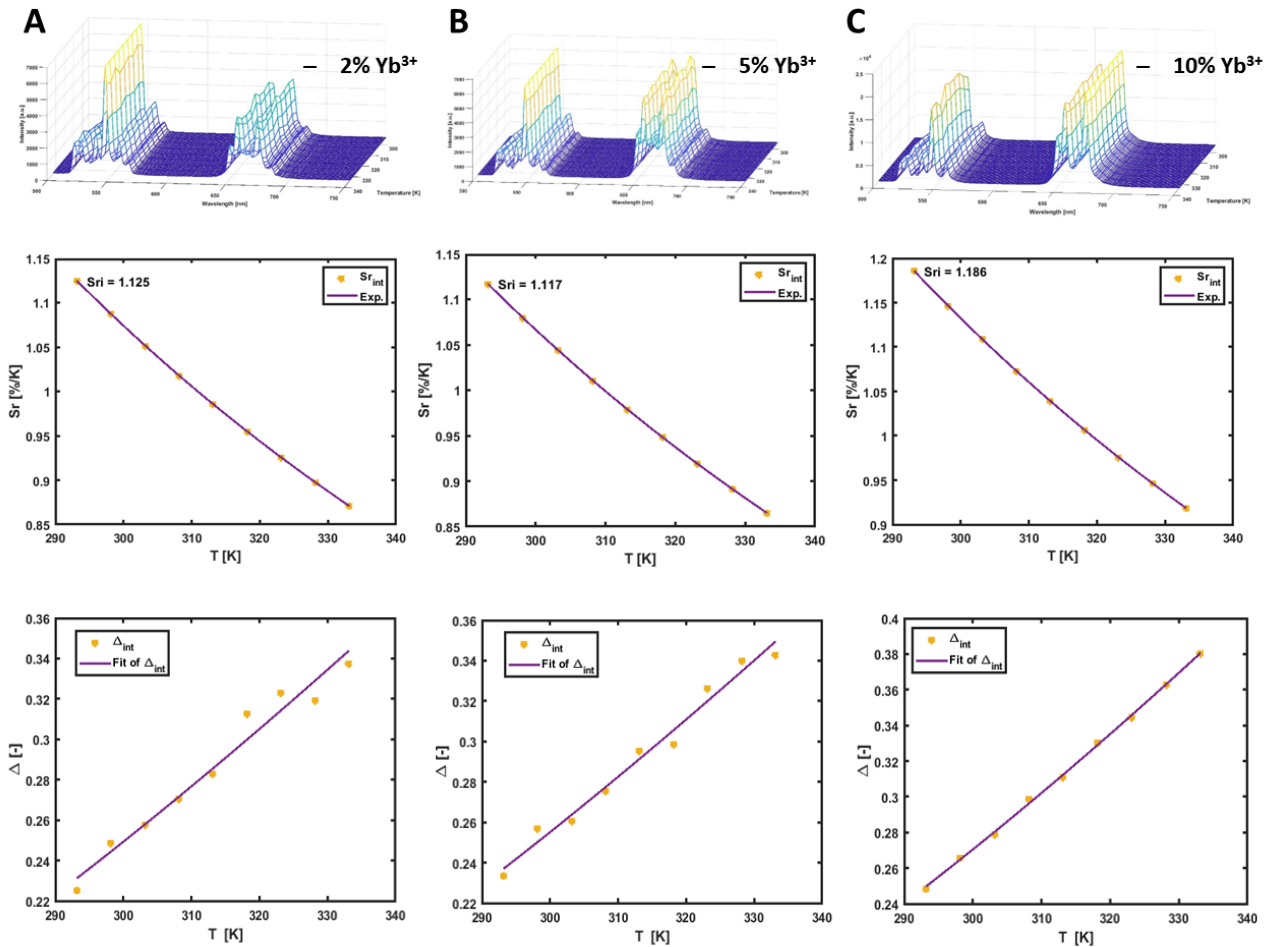

**Figure S6.** Emission maps, plot of the relative sensitivity ( $S_r$ ) and the points show the experimental  $\Delta$  parameters, and the solid line shows the least squares fit to the experimental points varying temperatures: 293.15–333.15 (20–60 °C) for SiO<sub>2</sub>@YOF:x%Yb<sup>3+</sup>,1%Er<sup>3+</sup> (A) 2% Yb<sup>3+</sup>, (B) 5% Yb<sup>3+</sup> and (C) 8% Yb<sup>3+</sup>.

**Table S4.** Overview of  $R^2$  and  $S_r$  values for  $\text{SiO}_2@\text{YOF}:x\%\text{Yb}^{3+},1\%\text{Er}^{3+}$

| $\text{SiO}_2@\text{YOF}:x\%\text{Yb}^{3+},1\%\text{Er}^{3+}$ | $R^2$ | $S_r$ (% $\text{K}^{-1}$ ) |
|---------------------------------------------------------------|-------|----------------------------|
| 2% $\text{Yb}^{3+}$                                           | 0.966 | 1.125                      |
| 5% $\text{Yb}^{3+}$                                           | 0.979 | 1.117                      |
| 10% $\text{Yb}^{3+}$                                          | 0.998 | 1.186                      |
| 20% $\text{Yb}^{3+}$                                          | 0.994 | 0.716                      |

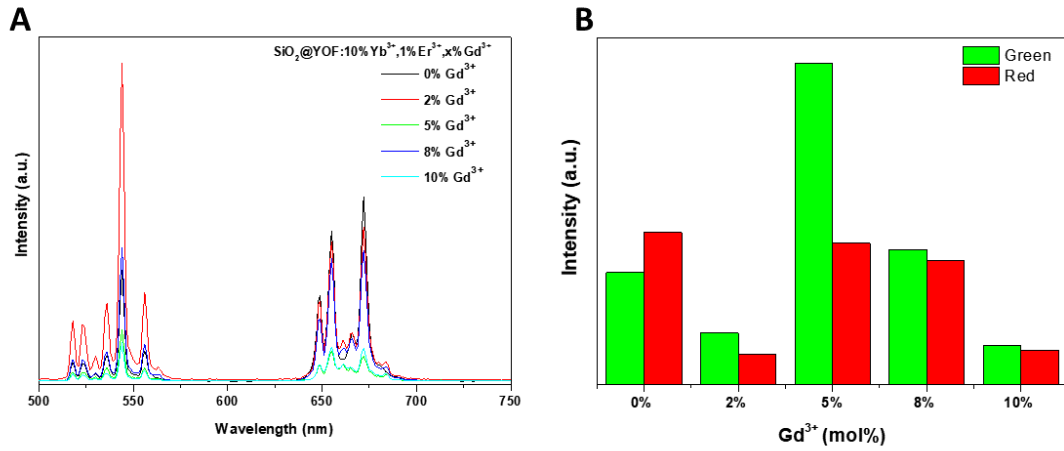

**Figure S7.** (A) Emission spectra and (B) Green/Red (G/R) ratios for  $\text{SiO}_2@\text{YOF}: 10\%\text{Yb}^{3+},1\%\text{Er}^{3+},x\%\text{Gd}^{3+}$  ( $x = 2\%, 5\%, 8\%, 10\%$ ).

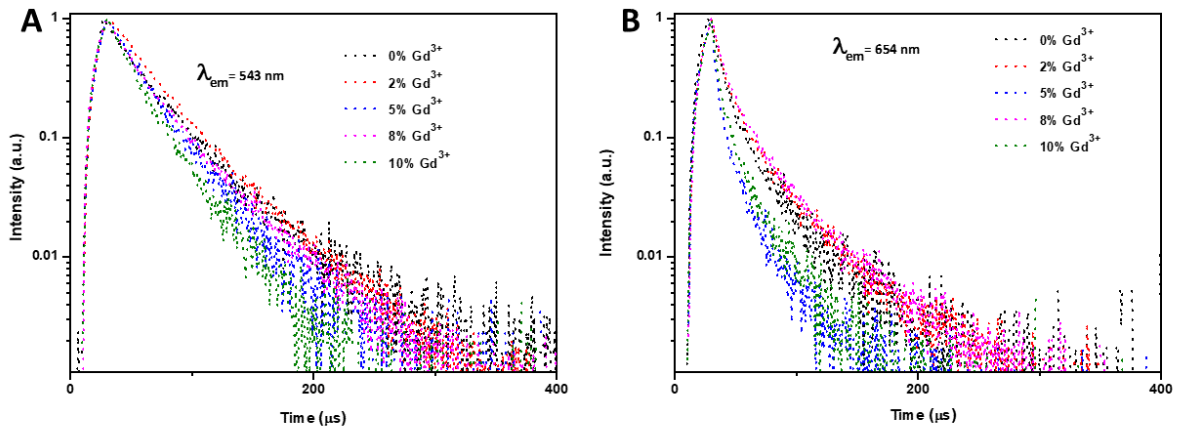

**Figure S8.** Luminescence decay profiles for (A) green  $^4\text{S}_{3/2} \rightarrow ^4\text{I}_{15/2}$  (543 nm) and (B) red  $^4\text{F}_{9/2} \rightarrow ^4\text{I}_{15/2}$  (654 nm) emission peaks in  $\text{SiO}_2@\text{YOF}:10\%\text{Yb}^{3+},1\%\text{Er}^{3+},x\%\text{Gd}^{3+}$  ( $x = 2\%, 5\%, 8\%, 10\%$ ).

**Table S5.**  
Overview of decay curves and  $R^2$  of the green

| $\text{SiO}_2@YOF:10\%Yb^{3+},1\%Er^{3+},x\%Gd^{3+}$ | $\tau_{543}$ [ $\mu\text{s}$ ] | $R^2$ |
|------------------------------------------------------|--------------------------------|-------|
| 0% $Gd^{3+}$                                         | 264                            | 0.995 |
| 2% $Gd^{3+}$                                         | 271                            | 0.991 |
| 5% $Gd^{3+}$                                         | 318                            | 0.998 |
| 8% $Gd^{3+}$                                         | 240                            | 0.997 |
| 10% $Gd^{3+}$                                        | 210                            | 0.990 |

$^4S_{3/2} \rightarrow ^4I_{15/2}$  (543 nm) and red  $^4F_{9/2} \rightarrow ^4I_{15/2}$  (654 nm) emission peaks.

| $\text{SiO}_2@YOF:10\%Yb^{3+},1\%Er^{3+},x\%Gd^{3+}$ | $\tau_{654}$ [ $\mu\text{s}$ ] | $R^2$ |
|------------------------------------------------------|--------------------------------|-------|
| 0% $Gd^{3+}$                                         | 103                            | 0.993 |
| 2% $Gd^{3+}$                                         | 38                             | 0.991 |
| 5% $Gd^{3+}$                                         | 86                             | 0.995 |
| 8% $Gd^{3+}$                                         | 107                            | 0.996 |
| 10% $Gd^{3+}$                                        | 48                             | 0.992 |



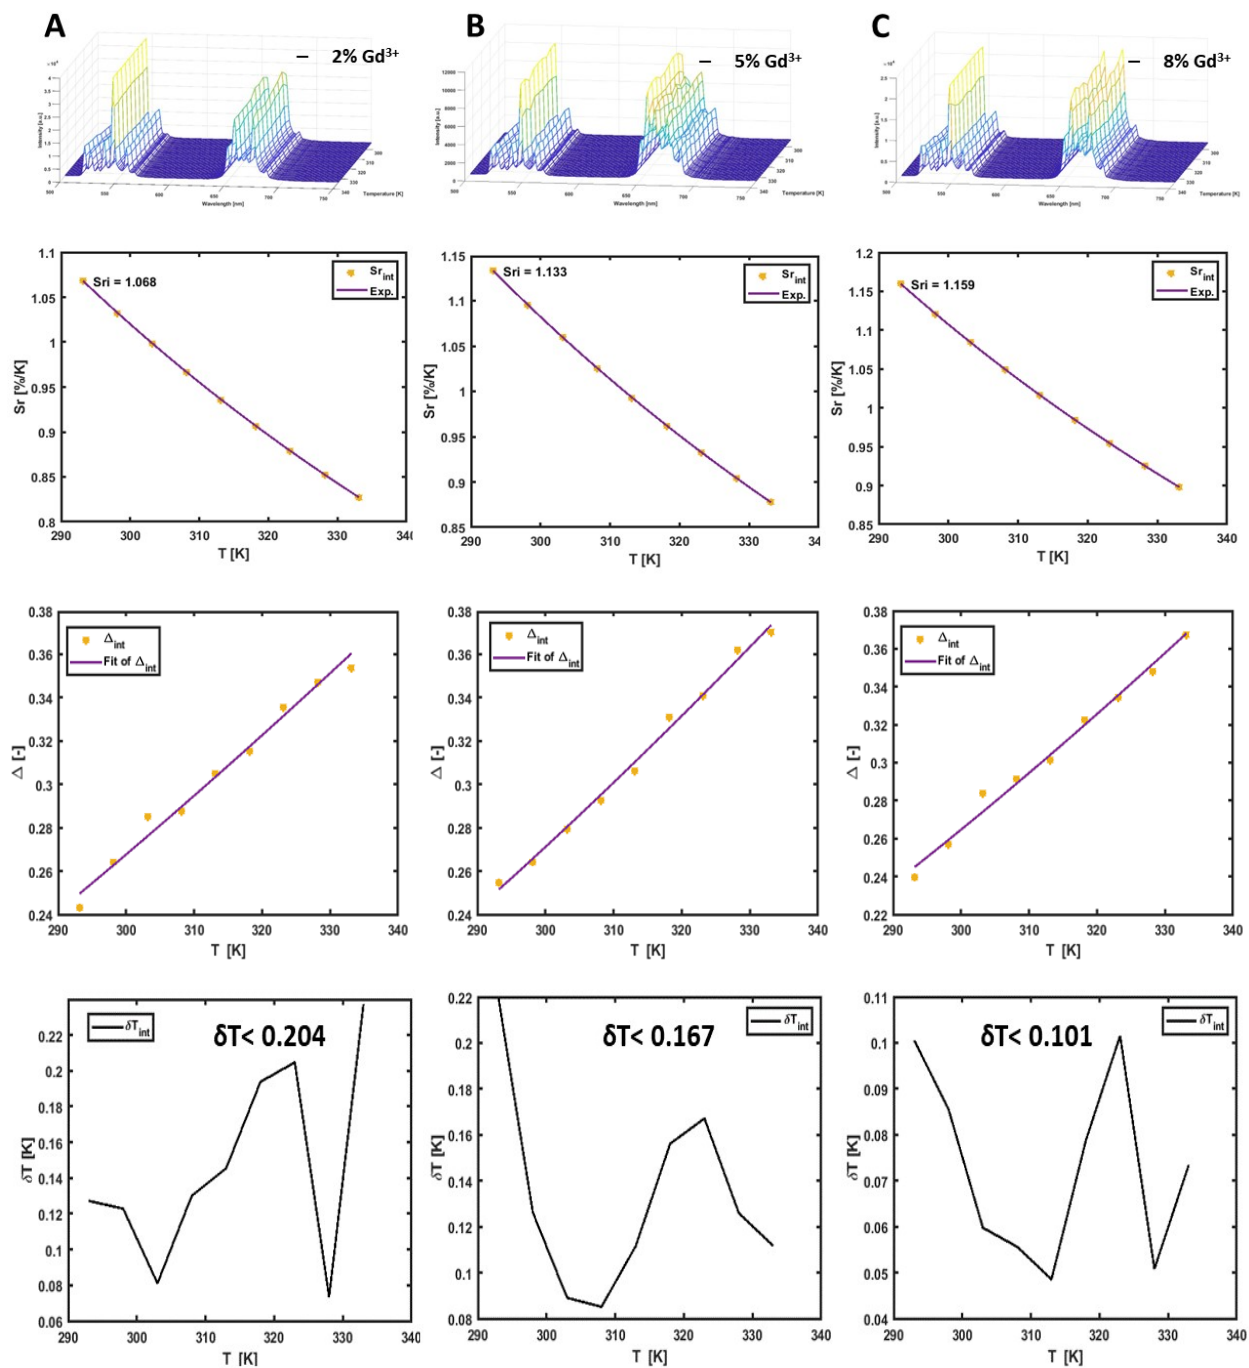

**Figure S9.** Emission maps, plot of the relative sensitivity ( $S_r$ ) and the points show the experimental  $\Delta$  parameters, the solid line shows the least squares fit to the experimental points at varying temperatures: 293.15–333.15 (20–60 °C) and graph depicting the temperature uncertainty in the whole temperature range for  $\text{SiO}_2\text{:YOF:10\%Yb}^{3+}, 1\%\text{Er}^{3+}, x\%\text{Gd}^{3+}$  where  $x =$  (A) 2%  $\text{Gd}^{3+}$ , (B) 5%  $\text{Gd}^{3+}$  and (C) 8%  $\text{Gd}^{3+}$ .

**Table S6:** Overview of  $R^2$  and  $S_r$  values for  $\text{SiO}_2@\text{YOF}:10\%\text{Yb}^{3+},1\%\text{Er}^{3+},x\%\text{Gd}^{3+}$

| $\text{SiO}_2@\text{YOF}:10\%\text{Yb}^{3+},1\%\text{Er}^{3+},x\%\text{Gd}^{3+}$ | $R^2$ | $S_r$ (% $\text{K}^{-1}$ ) |
|----------------------------------------------------------------------------------|-------|----------------------------|
| 0% $\text{Gd}^{3+}$                                                              | 0.998 | 1.182                      |
| 2% $\text{Gd}^{3+}$                                                              | 0.983 | 1.068                      |
| 5% $\text{Gd}^{3+}$                                                              | 0.999 | 1.133                      |
| 8% $\text{Gd}^{3+}$                                                              | 0.988 | 1.159                      |

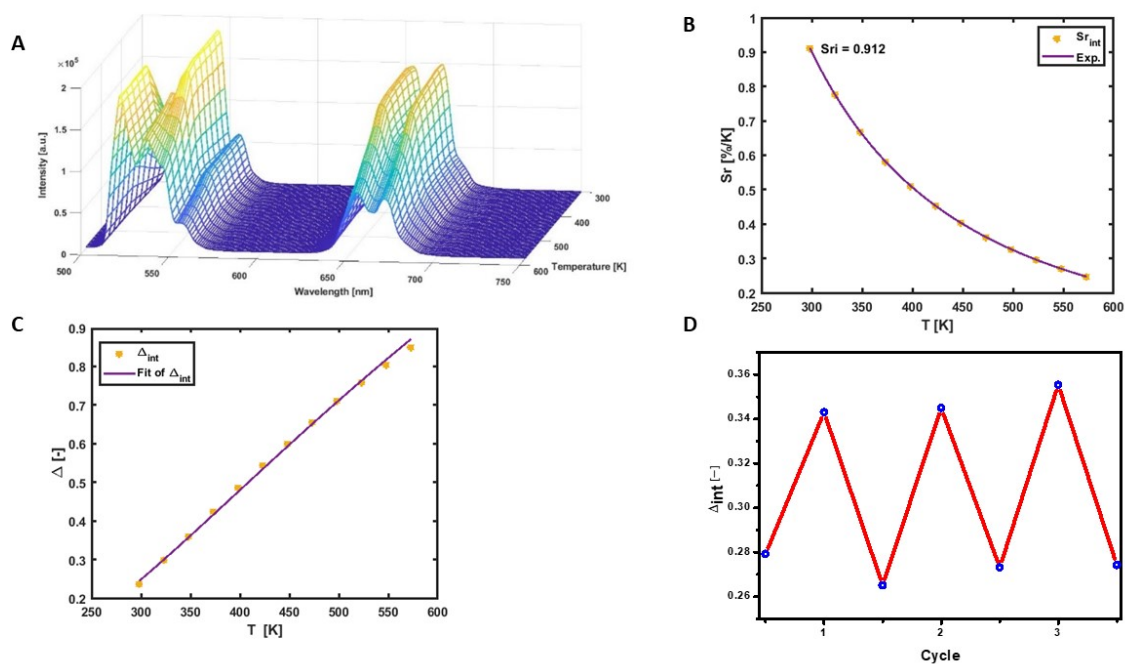

**Figure S10.** (A) Emission map, (B)  $S_r$  sensitivity from 25 to 300 °C (298.15–573.15 K), (C) experimental  $\Delta$  parameters with the least squares fit for solid  $\text{SiO}_2@\text{YOF}:\text{Yb}^{3+},\text{Er}^{3+},5\%\text{Gd}^{3+}$  and (D) cycle test for  $\text{SiO}_2@\text{YOF}:\text{Yb}^{3+},\text{Er}^{3+},5\%\text{Gd}^{3+}$  in DI water under two heating–cooling cycles: 293.15 K–333.15 K .

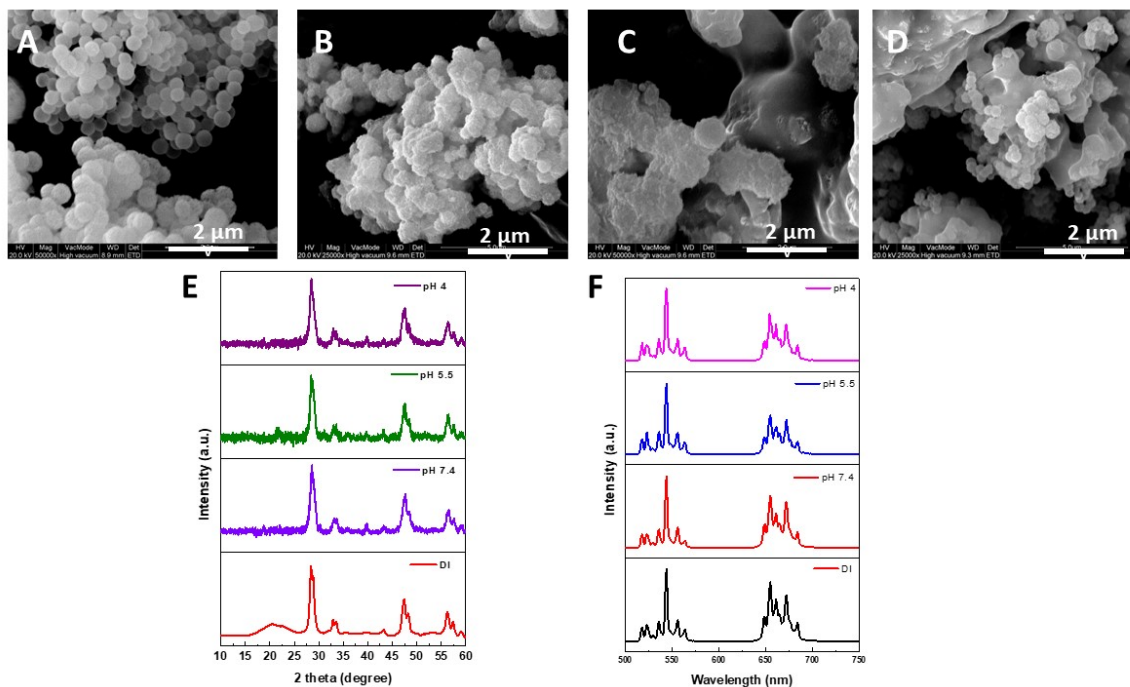

Figure S11. SEM images of (A) pristine SiO<sub>2</sub>@YOF:Yb<sup>3+</sup>,Er<sup>3+</sup>,5%Gd<sup>3+</sup>, and after being immersed in buffer solution for 48 h at varying pH values (B) PBS 7.4, (C) PBS 5.5, (D) PBS 4, (E) Powder XRD patterns of SiO<sub>2</sub>@YOF:Yb<sup>3+</sup>,Er<sup>3+</sup>,5%Gd<sup>3+</sup> after immersing in PBS for 48 h at pH 7.4, pH 5.5 and pH 4 and (F) UC emission spectrum of SiO<sub>2</sub>@YOF:Yb<sup>3+</sup>,Er<sup>3+</sup>,5%Gd<sup>3+</sup> after immersing in PBS with concentration 2mg/ml for 48 h at pH 7.4, pH 5.5 and pH 4.

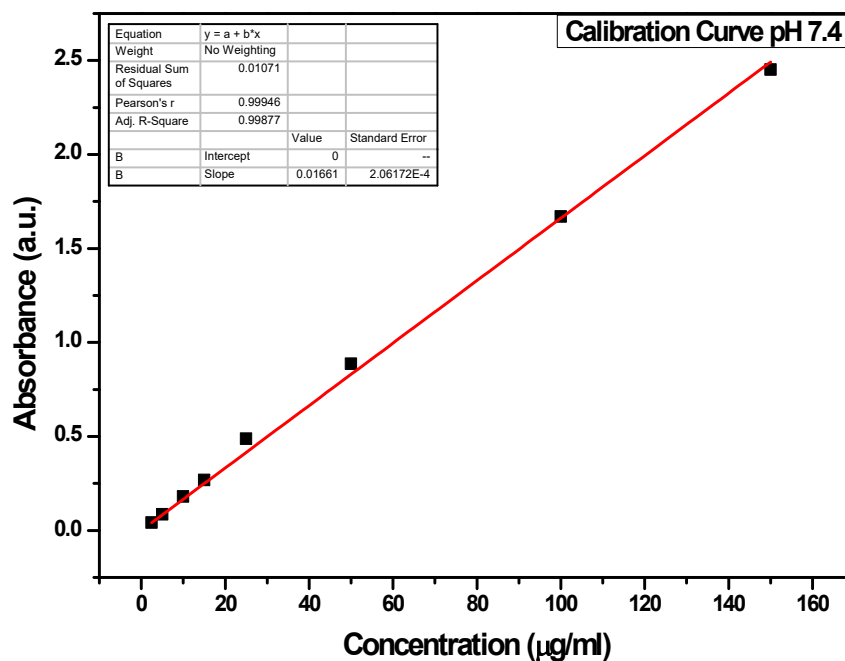

Figure S12. DOX calibration curve for PBS pH 7.4.

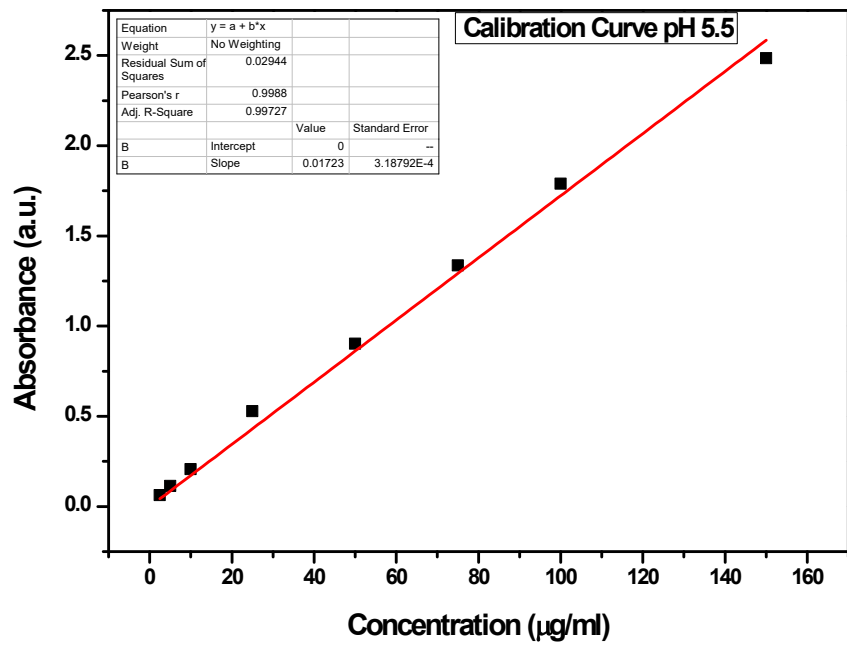

Figure S13. DOX calibration curve for PBS pH 5.5.

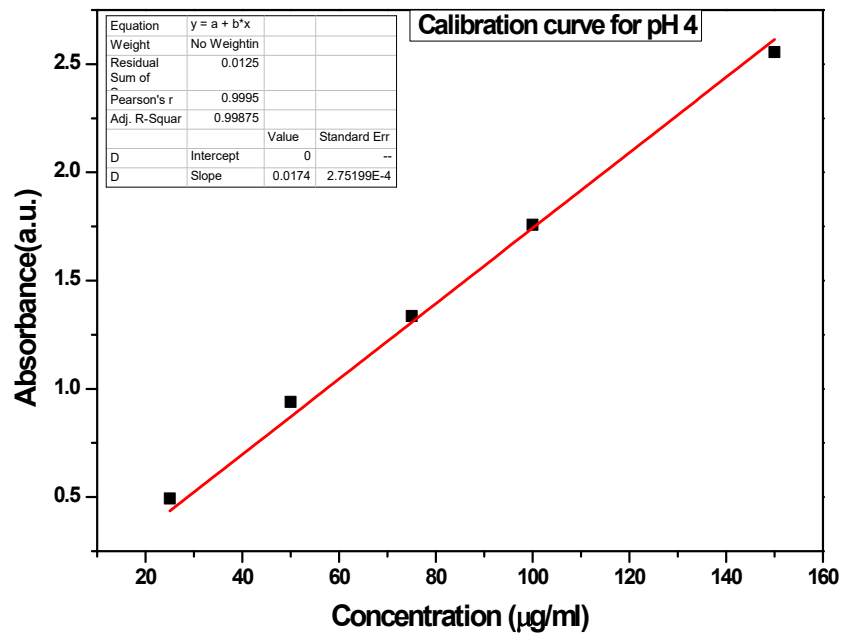

Figure S14. DOX calibration curve for PBS pH 4.

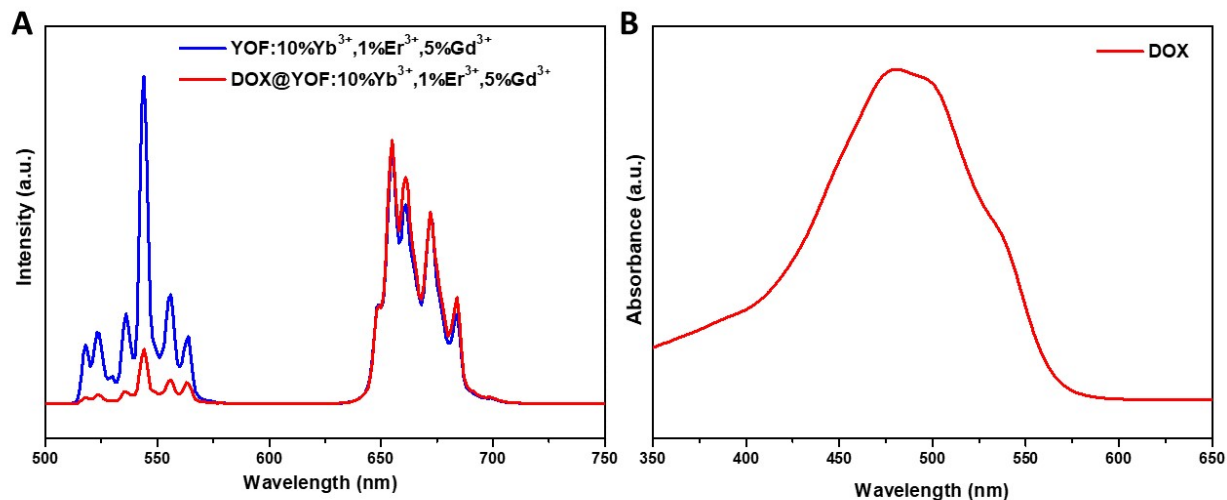

**Figure S15.** (A) Upconversion emission spectra of YOF:Yb<sup>3+</sup>,Er<sup>3+</sup>,5%Gd<sup>3+</sup> and DOX@ YOF:Yb<sup>3+</sup>,Er<sup>3+</sup>,5%Gd<sup>3+</sup> nanocarriers under 975 nm excitation. (B) UV-VIS absorption spectrum of DOX.

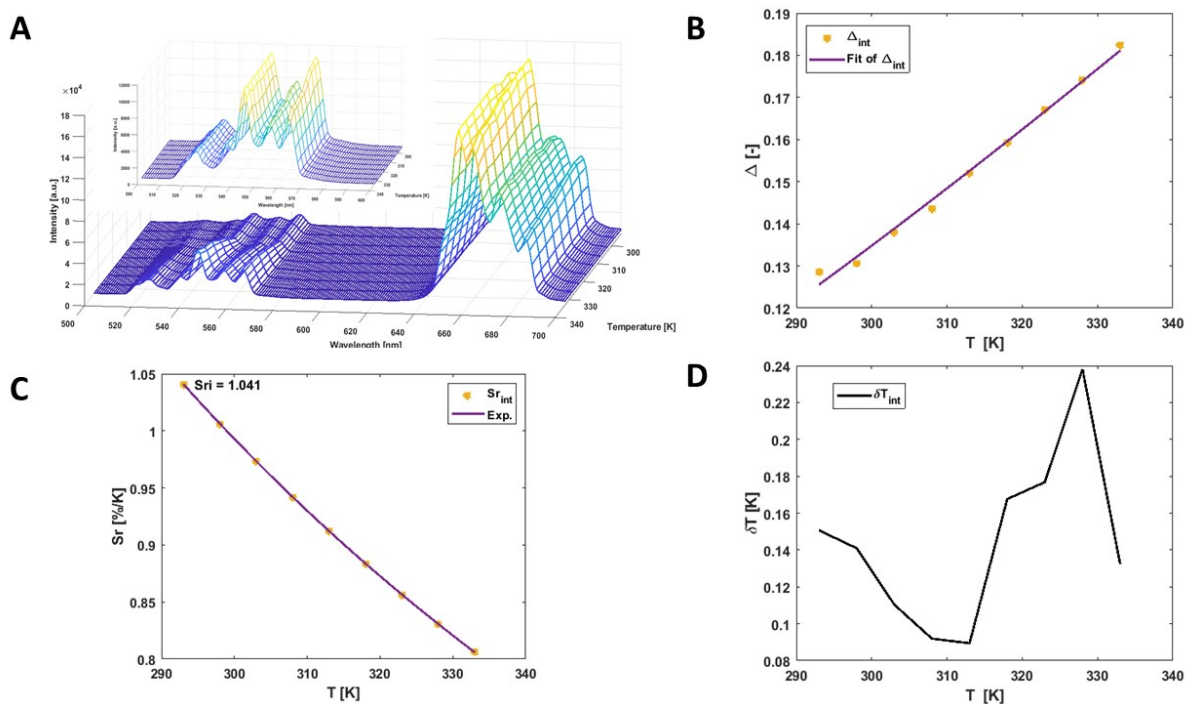

**Figure S16.** (A) Emission map, (B) experimental  $\Delta$  parameters with the least squares fit, (C)  $S_r$  sensitivity from 20 to 60 °C (293.15–333.15 K) and (D) Graph depicting the temperature uncertainty in the whole temperature range for DOX@YOF:Yb<sup>3+</sup>,Er<sup>3+</sup>,5%Gd<sup>3+</sup>.

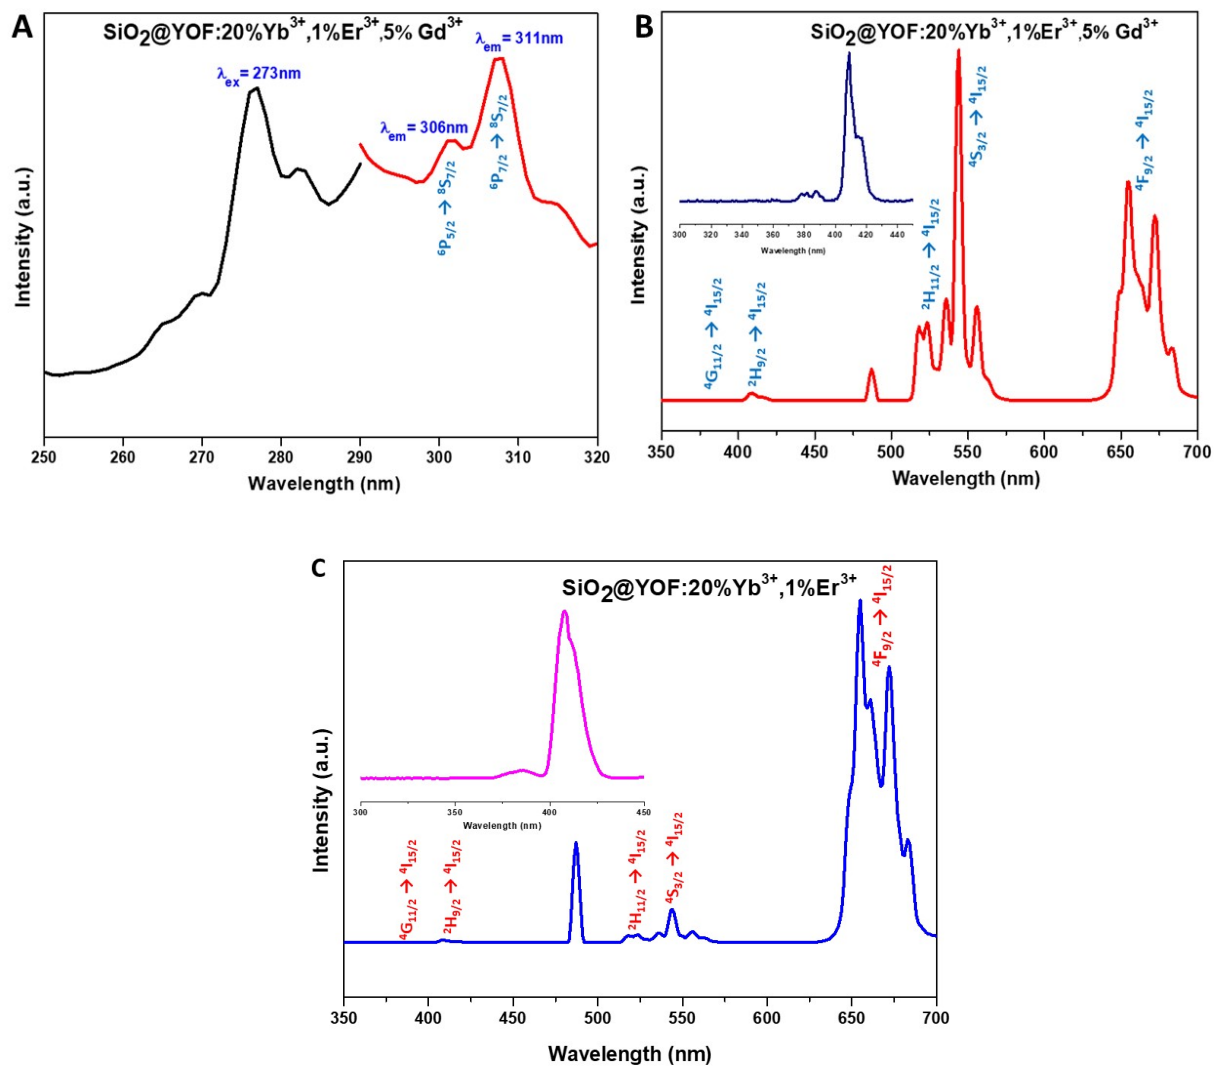

**Figure S17.** (A) Emission spectra of Gd<sup>3+</sup> in SiO<sub>2</sub>@YOF: Yb<sup>3+</sup>,Er<sup>3+</sup>,5%Gd<sup>3+</sup> under 273 nm excitation, (B) UC luminescence spectra of SiO<sub>2</sub>@YOF:Yb<sup>3+</sup>,Er<sup>3+</sup>,5%Gd<sup>3+</sup> and (C) SiO<sub>2</sub>@YOF:Yb<sup>3+</sup>,Er<sup>3+</sup> without Gd<sup>3+</sup> co-doping under 975 nm excitation in the range of 350-700 nm (the sharp peak at 485 nm is likely due to the excitation laser).

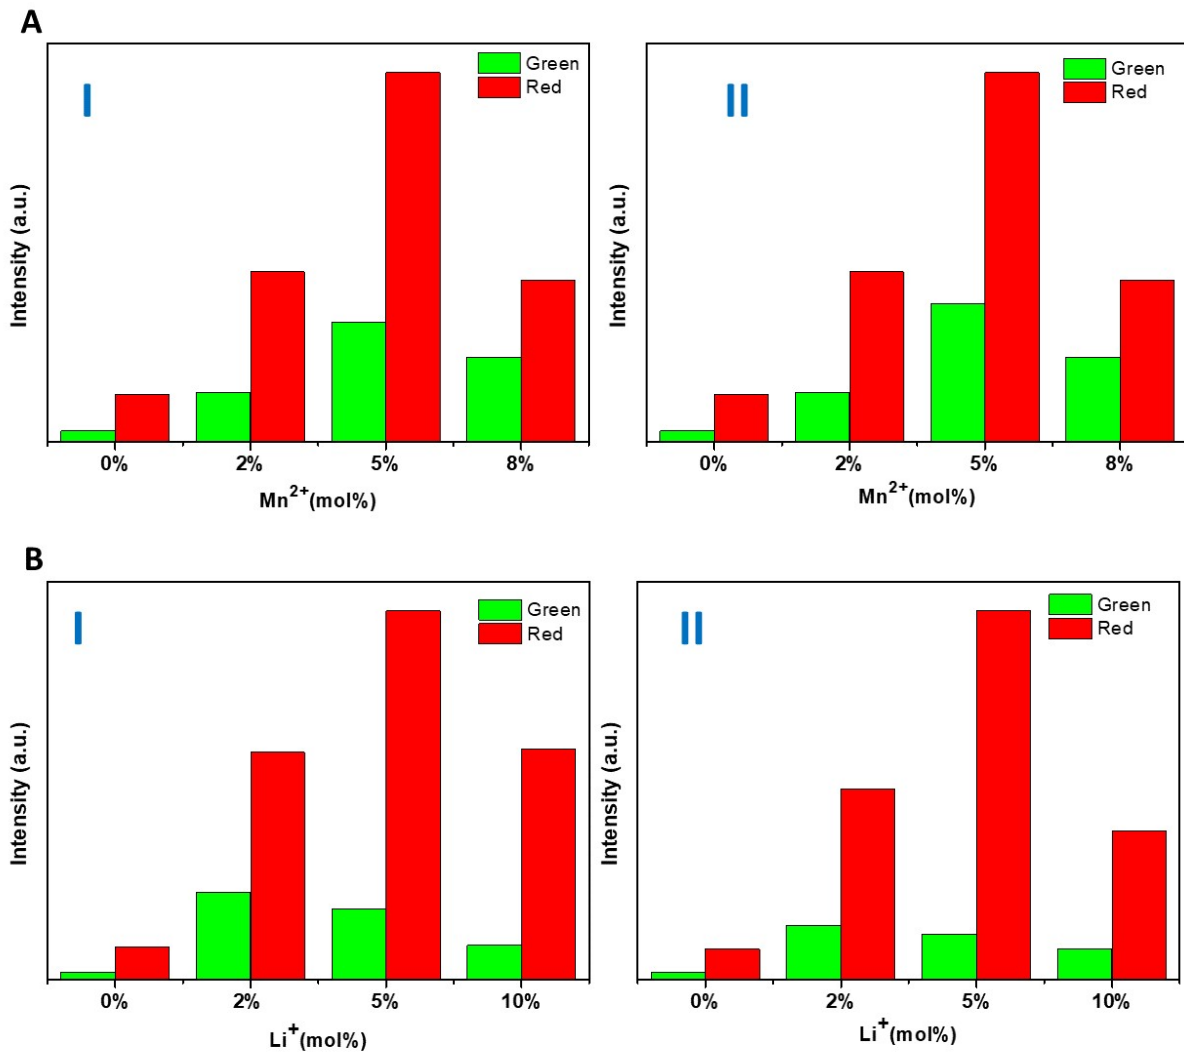

**Figure S18.** Repeated effect of (A) Mn<sup>2+</sup> and (B) Li<sup>+</sup> co-doping concentration on overall G/R intensity in SiO<sub>2</sub>@YOF:Yb<sup>3+</sup>,Er<sup>3+</sup> materials.
